# Supplementary material for: Effects of stacking method and strain on the electronic properties of the few-layer group-IVA monochalcogenide heterojunctions
Source: Royal Society of Chemistry journal article supplement (doi:10.1039/c8ra05086d), 2018-01-01
Supplement: c8ra05086d1.pdf [file c8ra05086d1.pdf]

## Electronic supplementary information (ESI)

### Effects of stacking method and strain on the electronic properties of the few layered group-IVA monochalcogenides heterojunctions

Yonghong Hu <sup>a, 1,\*</sup>, Caixia Mao <sup>a,1</sup>, Zhong Yan <sup>b</sup>, Ting Shu <sup>a</sup>, Hao Ni <sup>a</sup>, Li Xue <sup>a</sup>, Yunyi Wu <sup>c</sup>

<sup>a</sup> School of Nuclear Technology and Chemistry & Biology, Hubei University of Science and Technology, Xianning 437100, China.

<sup>b</sup> College of Material Science and Engineering, Nanjing University of Science and Technology, Nanjing 210094, China

<sup>c</sup> Department of Electrical Engineering, The Hong Kong Polytechnic University, Hung Hom, Kowloon, Hong Kong

E-mail:

hchyh2001@tom.com

## Table of contents

|           | Title                                                                                                                                                    | Page |
|-----------|----------------------------------------------------------------------------------------------------------------------------------------------------------|------|
| Figure S1 | Optimized crystal structure of the eighteen trilayer heterojunctions                                                                                     | S3   |
| Figure S2 | Optimized crystal structure of the twelve four-layer heterojunctions                                                                                     | S4   |
| Figure S3 | The energy band structures for the eighteen trilayer heterojunctions                                                                                     | S5   |
| Figure S4 | The energy band structures for the twelve four-layer heterojunctions                                                                                     | S6   |
| Figure S5 | PDOS diagrams of GeSe/GeS (a) and SnSe/GeSe (b) heterojunctions.                                                                                         | S7   |
| Figure S6 | Band gaps variations of the seven trilayer heterojunctions with biaxial strain                                                                           | S8   |
| Figure S7 | Band gaps variations of the six four-layer heterojunctions with biaxial strain                                                                           | S9   |
| Table S1  | The lattice constants, the average bond length, and the band gap of the group-IVA monochalcogenides monolayers                                           | S10  |
| Table S2  | Lattice constants, average bond length, average distance between the three monolayers, binding energy, and band gap of the trilayer vdW heterojunctions  | S11  |
| Table S3  | Lattice constants, average bond length, average distance between the four monolayers, binding energy, and band gap of the four-layer vdW heterojunctions | S12  |
| Table S4  | Band structure variations with biaxial strain for the six bilayer heterojunctions                                                                        | S13  |
| Table S6  | Band structure variations with biaxial strain for the seven trilayer heterojunctions                                                                     | S14  |
| Table S7  | Band structure variations with biaxial strain for the six four-layer heterojunctions                                                                     | S15  |

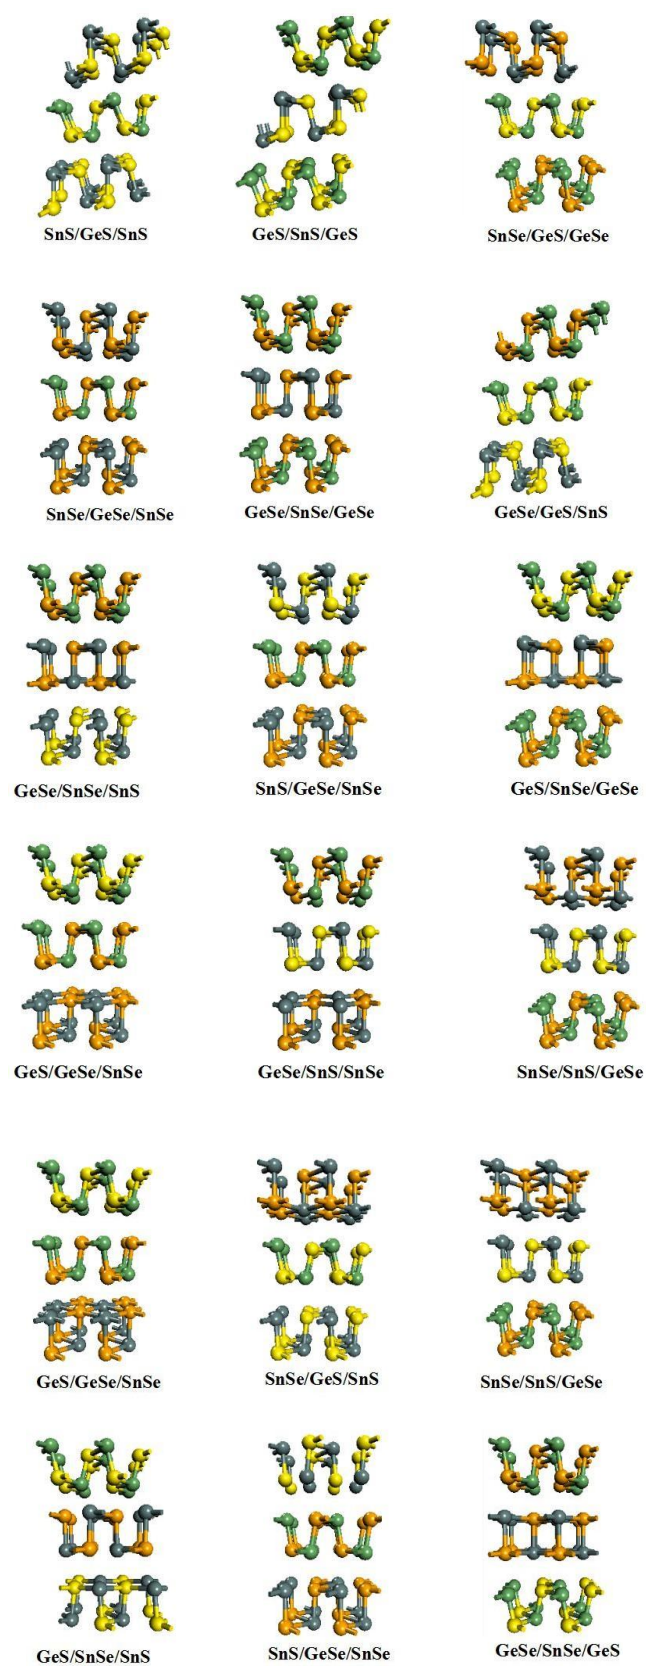

Figure S1. Optimized crystal structure of the eighteen heterojunctions. Among them, yellow, green, orange, and gray balls represent S, Ge, Se, and Sn atoms, respectively.

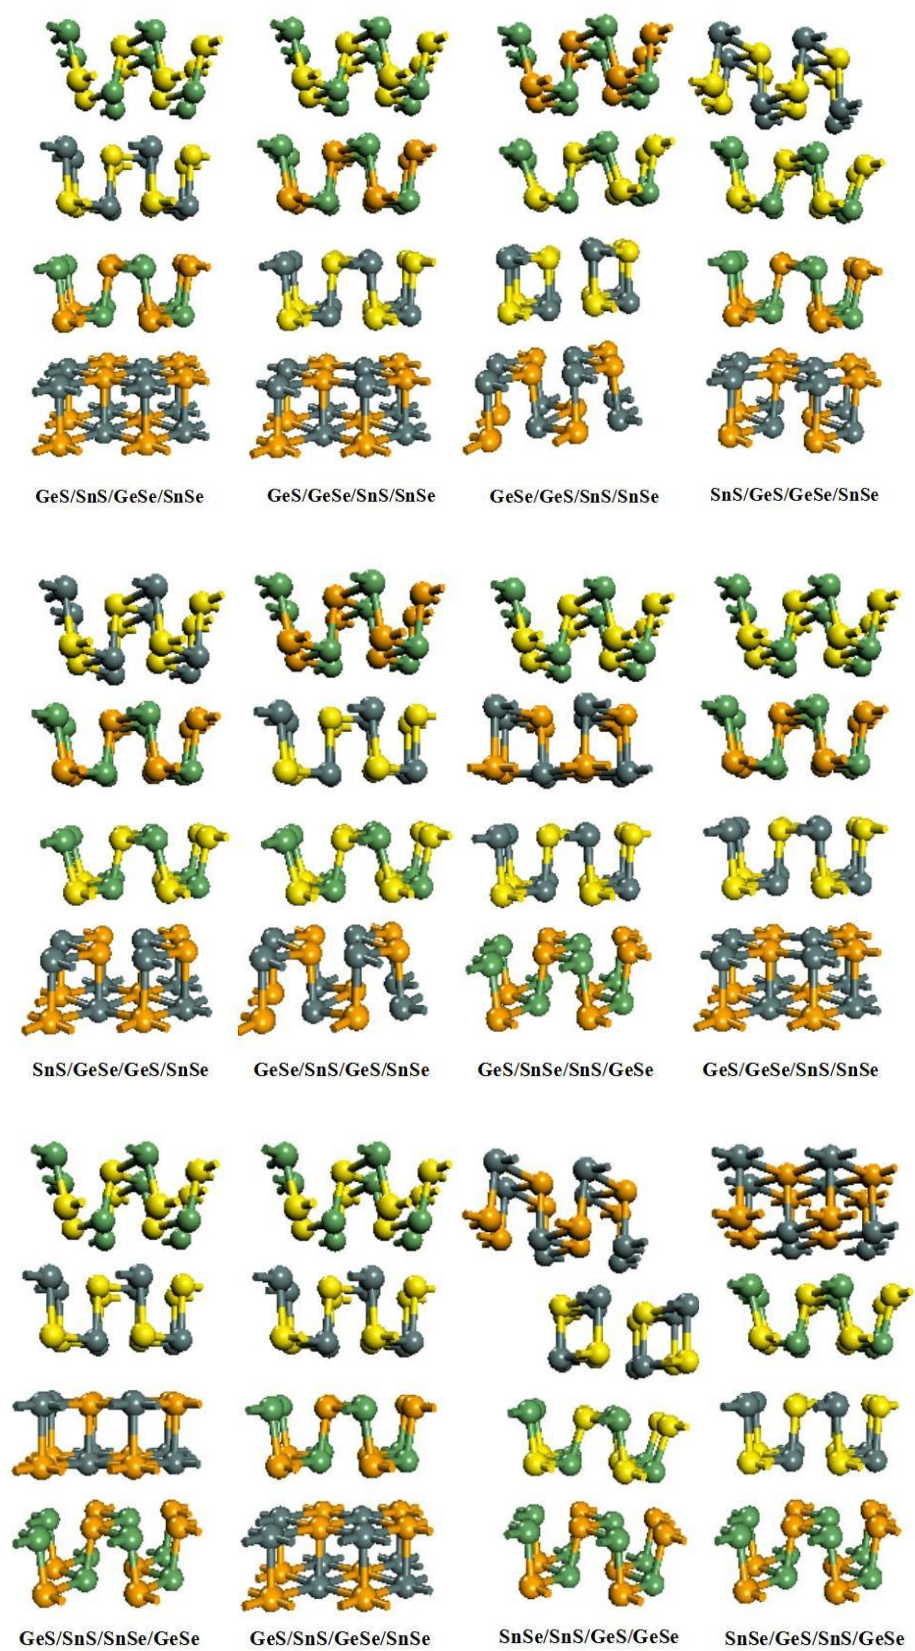

Figure S2. Optimized crystal structure of the twelve heterojunctions. Among them, yellow, green, orange, and gray balls represent S, Ge, Se, and Sn atoms, respectively.



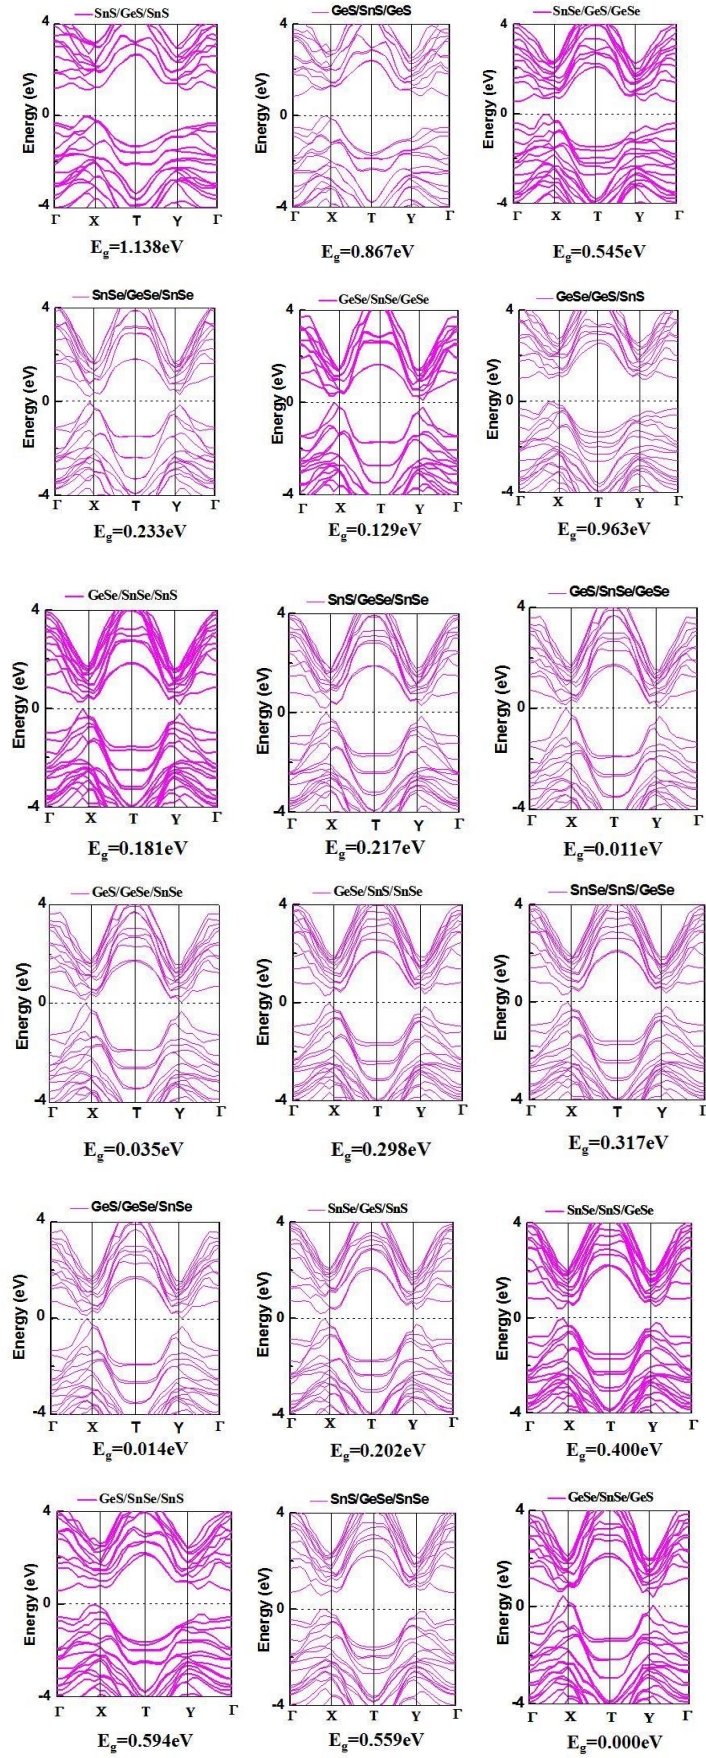

Figure S3. The energy band structures for the eighteen trilayer heterojunctions.

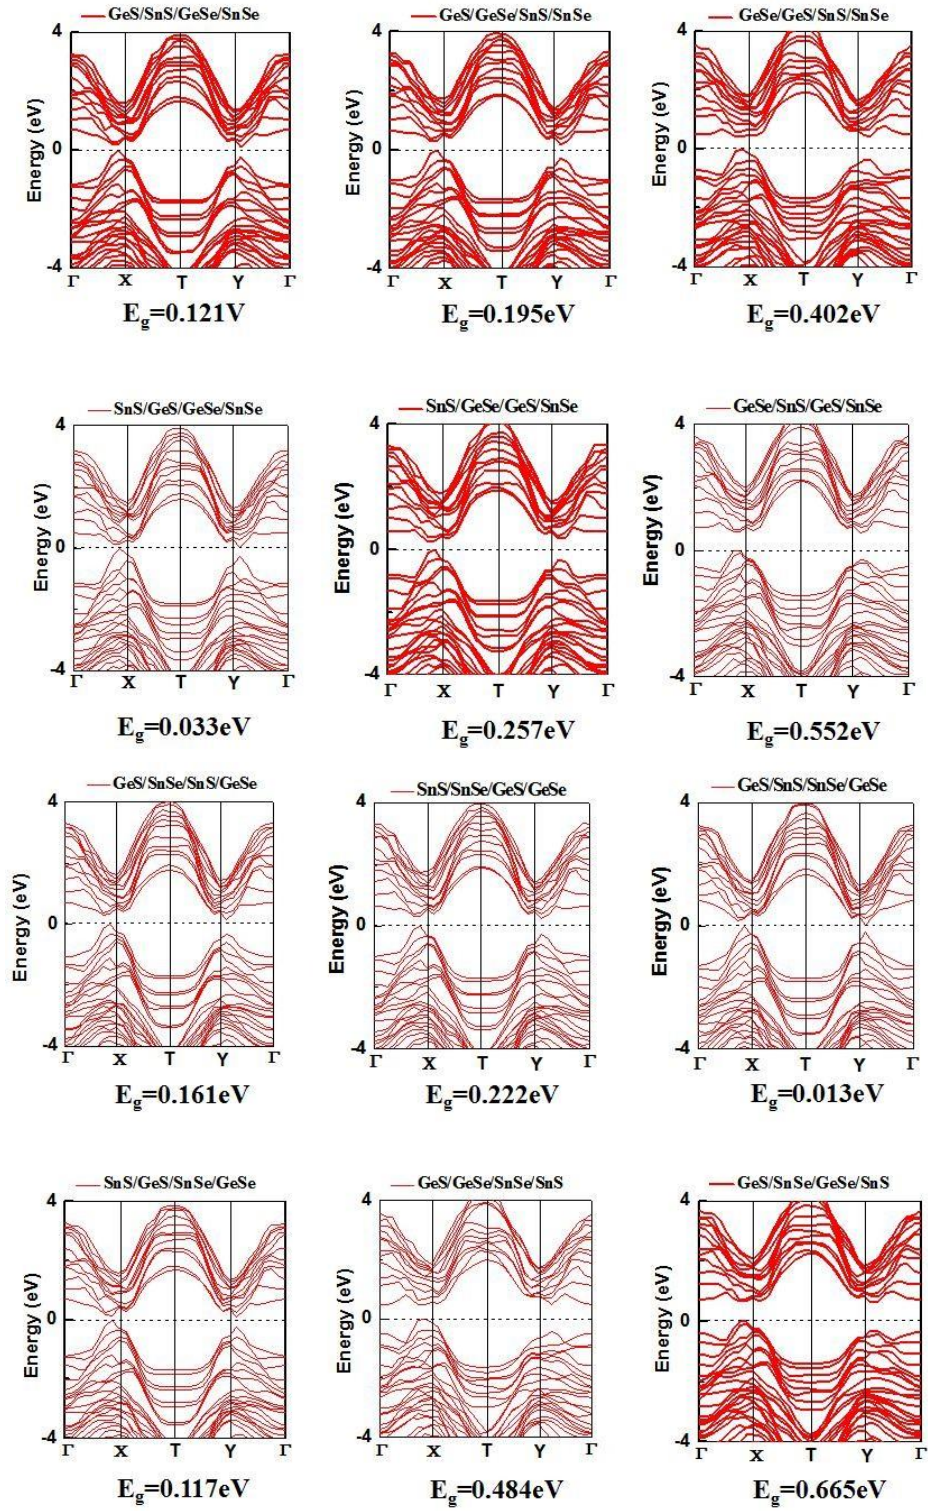

Figure S4. The energy band structures for the twelve four-layer heterojunctions.

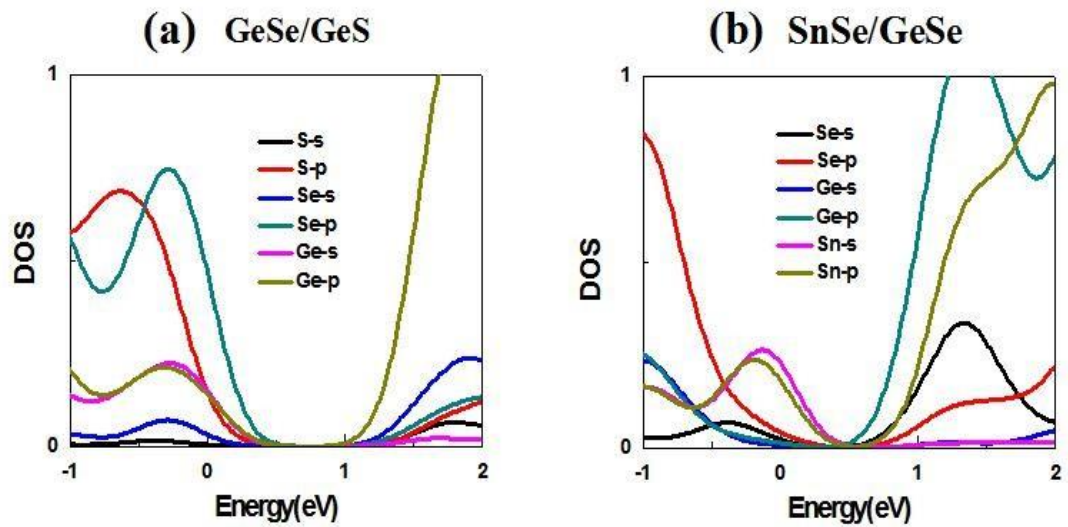

Figure S5. PDOS diagrams of GeSe/GeS (a) and SnSe/GeSe (b) heterojunctions. It's found from Fig. S5(a) that P orbitals of S and Se atoms contribute the VBM most and orbital of Ge atom contribute the CBM most. It's found from Fig. S5(b) that P orbital of Se atom contribute the VBM most and p orbitals of Ge and Sn atoms contribute the CBM most.

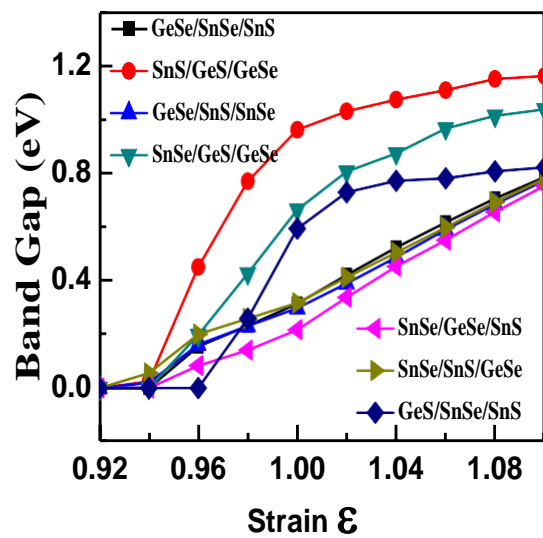

Figure S6. Band gaps variations of the seven trilayer heterojunctions with biaxial strain.



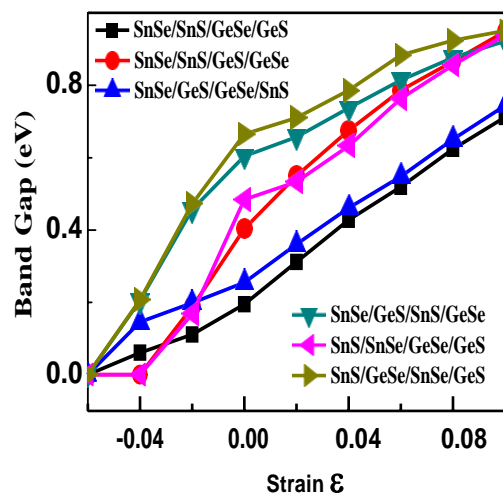

Figure S7. Band gaps variations of the six four-layer heterojunctions with biaxial strain.

Tab. S1 The lattice constants ( $a$  and  $b$ ), the average bond length ( $\bar{l}$ ), and the band gap value ( $E_g$ ) of the group-IVA monochalcogenides monolayers. In the table, “I” represent indirect gap, and “D” represents direct gap.

| Monolayers | $a$ (Å) | $b$ (Å) | $\bar{l}$ (Å) | $E_g$ (eV) |
|------------|---------|---------|---------------|------------|
| GeS        | 3.72    | 4.25    | 2.45          | 1.64 I     |
| GeSe       | 3.97    | 4.12    | 2.59          | 1.20 D     |
| SnS        | 4.10    | 4.17    | 2.71          | 1.50 I     |
| SnSe       | 4.25    | 4.31    | 2.82          | 1.10 I     |

Tab. S2 Lattice constants ( $a$  and  $b$ ), average bond length ( $\bar{l}$ ), average distance between the three monolayers ( $\bar{d}$ ), binding energy ( $E_b$ ), and band gap ( $E_g$ ) of the trilayer vdW heterojunction crystals of group-IVA monochalcogenides. In the table, “I ” represent indirect gap, and “D ”represents direct gap.

| Models         | $a$ (Å) | $b$ (Å) | $\bar{l}$ (Å) | $\bar{d}$ (Å) | $E_b$ (meV) | $E_g$ (eV) |
|----------------|---------|---------|---------------|---------------|-------------|------------|
| SnS/GeS/SnS    | 3.94    | 4.29    | 2.60          | 3.17          | -80.8       | 1.138 I    |
| GeS/SnS/GeS    | 3.83    | 4.25    | 2.51          | 3.39          | -79.7       | 0.867 I    |
| SnSe/GeS/GeSe  | 3.96    | 4.28    | 2.62          | 2.92          | -56.1       | 0.545 I    |
| SnSe/GeSe/SnSe | 4.14    | 4.26    | 2.76          | 3.14          | -72.1       | 0.233 D    |
| GeSe/SnSe/GeSe | 4.04    | 4.21    | 2.70          | 3.12          | -74.9       | 0.129 I    |
| GeSe/GeS/SnS   | 3.90    | 4.21    | 2.56          | 3.07          | -69.7       | 0.963 I    |
| GeSe/SnSe/SnS  | 4.10    | 4.21    | 2.72          | 3.15          | -74.0       | 0.181 I    |
| SnS/GeSe/SnSe  | 4.10    | 4.22    | 2.71          | 3.25          | -66.2       | 0.217 D    |
| GeS/SnSe/GeSe  | 3.98    | 4.24    | 2.63          | 3.13          | -59.5       | 0.011 I    |
| GeS/GeSe/SnSe  | 3.99    | 4.23    | 2.64          | 3.18          | -53.0       | 0.035 I    |
| GeSe/SnS/SnSe  | 4.10    | 4.22    | 2.70          | 3.25          | -64.8       | 0.298 I    |
| SnSe/SnS/GeSe  | 4.10    | 4.22    | 2.71          | 3.21          | -68.9       | 0.317 I    |
| GeS/GeSe/SnSe  | 4.00    | 4.22    | 2.63          | 3.19          | -53.0       | 0.014 I    |
| SnSe/GeS/SnS   | 4.05    | 4.23    | 2.64          | 3.14          | -49.0       | 0.202 I    |
| SnSe/SnS/GeSe  | 4.10    | 4.22    | 2.70          | 3.22          | -68.6       | 0.400 I    |
| GeS/SnSe/SnS   | 4.00    | 4.23    | 2.64          | 2.74          | -74.4       | 0.594 I    |
| SnS/GeSe/SnSe  | 4.10    | 4.22    | 2.57          | 3.06          | -50.0       | 0.559 D    |
| GeSe/SnSe/GeS  | 4.04    | 4.21    | 2.69          | 3.09          | -74.9       | 0.000      |

Tab. S3 Lattice constants ( $a$  and  $b$ ), average bond length ( $\bar{l}$ ), average distance between the four monolayers ( $\bar{d}$ ), binding energy ( $E_b$ ), and band gap ( $E_g$ ) of the four-layer vdW heterojunction crystals of group-IVA monochalcogenides. In the table, “I ” represent indirect gap, and “D ”represents direct gap.

| Models            | $a$ (Å) | $b$ (Å) | $\bar{l}$ (Å) | $\bar{d}$ (Å) | $E_b$ (meV) | $E_g$ (eV) |   |
|-------------------|---------|---------|---------------|---------------|-------------|------------|---|
| GeS/SnS/GeSe/SnSe | 4.02    | 4.20    | 2.629         | 3.19          | -67.2       | 0.121      | I |
| GeS/GeSe/SnS/SnSe | 4.01    | 4.22    | 2.651         | 3.20          | -67.4       | 0.195      | I |
| GeSe/GeS/SnS/SnSe | 4.01    | 4.23    | 2.628         | 3.42          | -72.1       | 0.402      | I |
| SnS/GeS/GeSe/SnSe | 4.01    | 4.22    | 2.652         | 3.08          | -69.8       | 0.033      | I |
| SnS/GeSe/GeS/SnSe | 4.01    | 4.22    | 2.640         | 3.14          | -63.5       | 0.257      | I |
| GeSe/SnS/GeS/SnSe | 4.01    | 4.22    | 2.649         | 3.07          | -69.4       | 0.552      | I |
| GeS/SnSe/SnS/GeSe | 4.01    | 4.22    | 2.648         | 3.06          | -73.9       | 0.161      | I |
| GeS/GeSe/SnS/SnSe | 4.01    | 4.22    | 2.649         | 3.17          | -66.9       | 0.222      | I |
| GeS/SnS/SnSe/GeSe | 4.02    | 4.20    | 2.655         | 3.09          | -74.2       | 0.013      | I |
| GeS/SnS/GeSe/SnSe | 4.02    | 4.20    | 2.654         | 3.13          | -68.5       | 0.117      | I |
| SnSe/SnS/GeS/GeSe | 4.00    | 4.25    | 2.632         | 2.98          | -75.1       | 0.484      | I |
| SnSe/GeS/SnS/GeSe | 4.00    | 4.23    | 2.645         | 3.11          | -69.7       | 0.625      | I |





Table S5. Band structure variations with biaxial stress for the seven trilayer heterojunctions. In this table, “I” represent indirect gap, and “D” represents direct gap.

| Band gap (eV) | strain $\mathcal{E}$ |       |       |       |       |       |       |       |       |       |       |       |
|---------------|----------------------|-------|-------|-------|-------|-------|-------|-------|-------|-------|-------|-------|
|               | -0.10                | -0.08 | -0.06 | -0.04 | -0.02 | 0.00  | 0.02  | 0.04  | 0.06  | 0.08  | 0.10  |       |
| Materials     | GeSe/SnSe/SnS        | 0     | 0     | 0     | 0.155 | 0.232 | 0.314 | 0.421 | 0.523 | 0.617 | 0.706 | 0.786 |
|               |                      | -     | -     | -     | D     | D     | D     | D     | D     | D     | D     | D     |
|               | GeSe/GeS/SnS         | 0     | 0     | 0.025 | 0.451 | 0.770 | 0.963 | 1.031 | 1.075 | 1.110 | 1.152 | 1.163 |
|               |                      | -     | -     | I     | I     | I     | I     | I     | I     | I     | I     | I     |
|               | GeSe/SnS/SnSe        | 0     | 0     | 0.019 | 0.162 | 0.231 | 0.298 | 0.390 | 0.487 | 0.590 | 0.685 | 0.773 |
|               |                      | -     | -     | I     | I     | I     | I     | I     | I     | D     | D     | D     |
|               | SnSe/SnS/GeSe        | 0     | 0     | 0.055 | 0.200 | 0.259 | 0.317 | 0.412 | 0.505 | 0.599 | 0.692 | 0.781 |
|               |                      | -     | -     | I     | I     | I     | I     | I     | I     | D     | D     | D     |
|               | SnSe/GeS/GeSe        | 0     | 0     | 0     | 0.197 | 0.427 | 0.665 | 0.807 | 0.874 | 0.967 | 1.015 | 1.039 |
|               |                      | -     | -     | -     | I     | I     | D     | D     | D     | I     | D     | D     |
|               | SnS/GeSe/SnSe        | 0     | 0     | 0     | 0.083 | 0.141 | 0.217 | 0.338 | 0.453 | 0.551 | 0.656 | 0.754 |
|               |                      | -     | -     | -     | I     | D     | D     | D     | D     | D     | D     | D     |
|               | GeS/SnSe/SnS         | 0     | 0     | 0     | 0     | 0.259 | 0.594 | 0.730 | 0.772 | 0.782 | 0.808 | 0.822 |
|               |                      | -     | -     | -     | -     | I     | I     | I     | I     | I     | I     | I     |

Table S6. Band structure variations with biaxial stress for the six four-layer heterojunctions. In this table, “I” represent indirect gap, and “D” represents direct gap.

| Band gap (eV) | strain $\mathcal{E}$ |       |       |       |       |       |       |       |       |       |       |       |
|---------------|----------------------|-------|-------|-------|-------|-------|-------|-------|-------|-------|-------|-------|
|               | -0.10                | -0.08 | -0.06 | -0.04 | -0.02 | 0.00  | 0.02  | 0.04  | 0.06  | 0.08  | 0.10  |       |
| Materials     | GeS/GeSe/SnS/SnSe    | 0     | 0     | 0     | 0.061 | 0.111 | 0.195 | 0.312 | 0.428 | 0.519 | 0.624 | 0.712 |
|               |                      | -     | -     | -     | I     | I     | I     | I     | I     | I     | I     | I     |
|               | GeSe/GeS/SnS/SnSe    | 0     | 0     | 0     | 0     | 0.187 | 0.404 | 0.550 | 0.675 | 0.786 | 0.866 | 0.949 |
|               |                      | -     | -     | -     | -     | I     | I     | I     | I     | I     | D     | D     |
|               | SnS/GeSe/GeS/SnSe    | 0     | 0     | 0     | 0.146 | 0.199 | 0.255 | 0.361 | 0.461 | 0.548 | 0.651 | 0.744 |
|               |                      | -     | -     | -     | I     | I     | I     | I     | I     | D     | D     | D     |
|               | GeSe/SnS/GeS/SnSe    | 0     | 0     | 0     | 0.205 | 0.457 | 0.604 | 0.657 | 0.737 | 0.814 | 0.876 | 0.922 |
|               |                      | -     | -     | -     | I     | I     | I     | D     | D     | D     | D     | D     |
|               | GeS/GeSe/SnSe/SnS    | 0     | 0     | 0     | 0     | 0.168 | 0.484 | 0.533 | 0.632 | 0.763 | 0.856 | 0.939 |
|               |                      | -     | -     | -     | -     | I     | I     | I     | I     | I     | I     | I     |
|               | GeS/SnSe/GeSe/SnS    | 0     | 0     | 0     | 0.207 | 0.472 | 0.625 | 0.710 | 0.786 | 0.883 | 0.924 | 0.951 |
|               |                      | -     | -     | -     | I     | D     | I     | D     | D     | I     | I     | D     |
